# Supplementary material
Source: Springer Nature journal article supplement (https://www.springermedizin.de/resource/supplementary/13058_2011_2873_MOESM2_ESM.pdf/9702762)

### A. Human

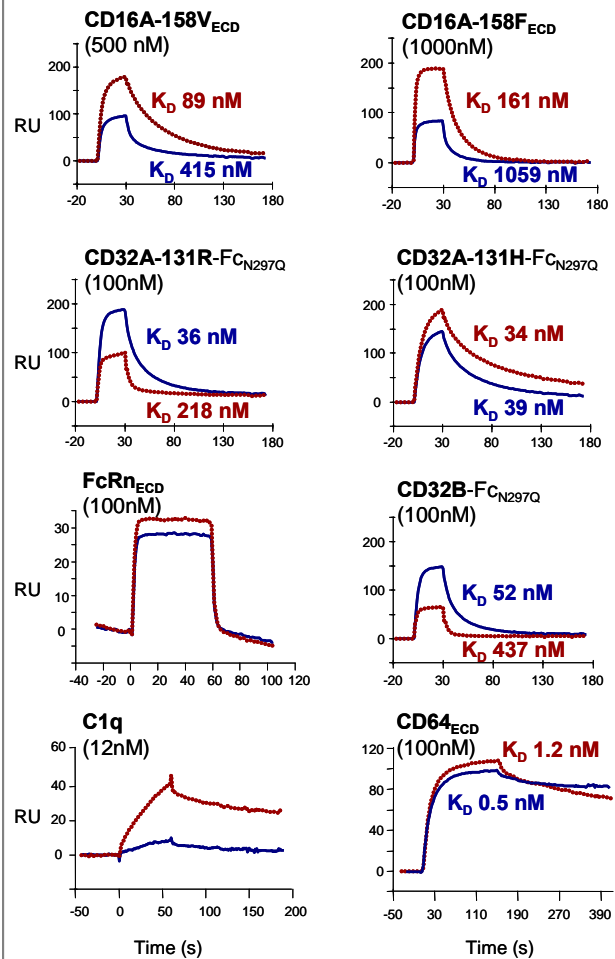

### B. Cynomolgus

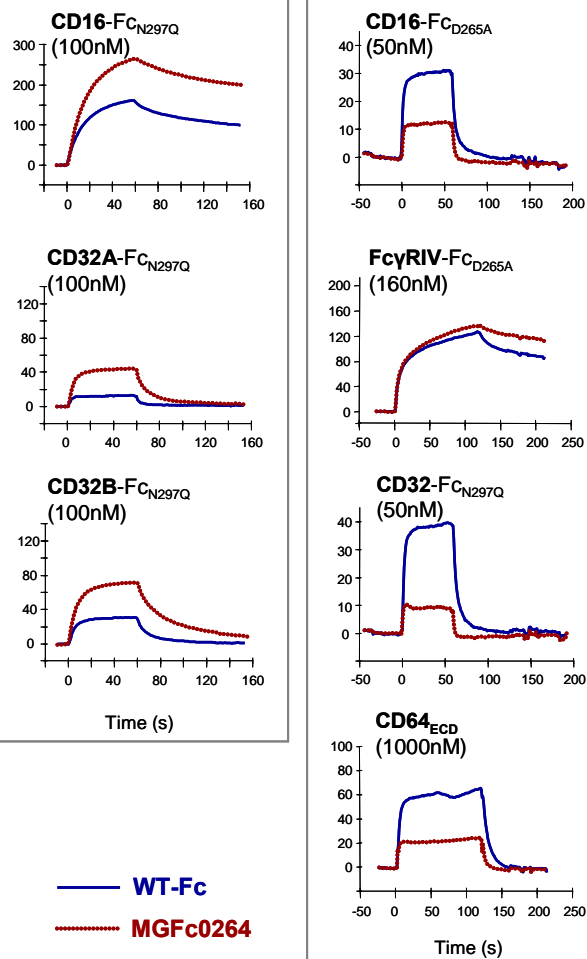

### C. Mouse

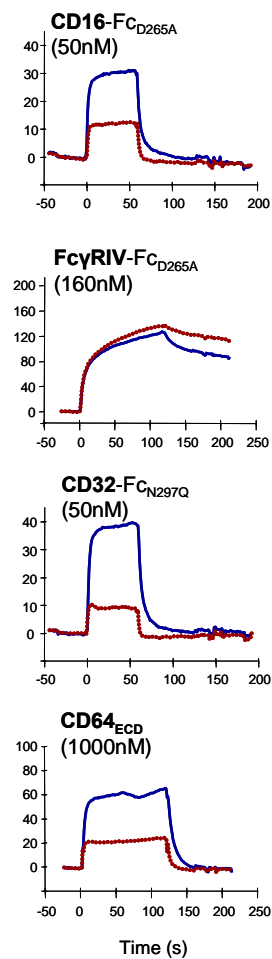

Supplement: MOESM2 [file 9702762]
